# Supplementary material for: Nisin E Is a Novel Nisin Variant Produced by Multiple Streptococcus equinus Strains
Source: MDPI journal article supplement (doi:10.3390/microorganisms11020427), 2023-02-08
Supplement: s1 [file s1]

## Supplementary Information

**Supplementary Table S1.** Type and origin of samples from which strains were isolated.

| Sample Type      | Number of Samples | Sample Source Location | Number of Isolates |
|------------------|-------------------|------------------------|--------------------|
| Raw sheep's milk | 74                | New Zealand            | 293                |
| Raw goat's milk  | 21                | New Zealand            | 174                |
| Raw cow's milk   | 9                 | Ireland                | 130                |
| Other*           | 8                 | -                      | 226                |

\* Unpasteurised sheep, goat, cow and buffalo cheeses, fresh honey, honeycomb, sheep faeces, and canine saliva samples.

**Supplementary Table S2.** Genomes of *Streptococcus equinus* used in pangenome analysis.

| Organism Scientific Name     | Organism Qualifier     | Assembly Name                           | Assembly Accession | Source | Level           | Size    |
|------------------------------|------------------------|-----------------------------------------|--------------------|--------|-----------------|---------|
| <i>Streptococcus equinus</i> | strain: ATCC 700338    | ASM14640v1                              | GCF_000146405.1    | RefSeq | Scaffold        | 2083084 |
| <i>Streptococcus equinus</i> | strain: ATCC 9812      | ASM18726v1                              | GCF_000187265.1    | RefSeq | Scaffold        | 1741734 |
| <i>Streptococcus equinus</i> | strain: SN033          | ASM42142v1                              | GCF_000421425.1    | RefSeq | Contig          | 1843423 |
| <i>Streptococcus equinus</i> | strain: B315           | ASM42404v1                              | GCF_000424045.1    | RefSeq | Scaffold        | 1786673 |
| <i>Streptococcus equinus</i> | strain: 2B             | ASM70210v1                              | GCF_000702105.1    | RefSeq | Scaffold        | 1919820 |
| <i>Streptococcus equinus</i> | strain: HC5            | ASM73108v1                              | GCF_000731085.1    | RefSeq | Scaffold        | 1846241 |
| <i>Streptococcus equinus</i> | strain: ATCC 33317     | ASM74719v1                              | GCF_000747195.1    | RefSeq | Contig          | 1841890 |
| <i>Streptococcus equinus</i> | strain: JB1            | Streptococcus bovis JB1                 | GCF_000747205.1    | RefSeq | Contig          | 1954216 |
| <i>Streptococcus equinus</i> | strain: AG46           | ASM96431v1                              | GCF_000964315.1    | RefSeq | Contig          | 1930741 |
| <i>Streptococcus equinus</i> | strain: ICDDR-B-NRC-S6 | ASM148148v1                             | GCF_001481485.1    | RefSeq | Contig          | 1849355 |
| <i>Streptococcus equinus</i> | strain: FMD1           | ASM452577v1                             | GCF_004525775.1    | RefSeq | Contig          | 1935083 |
| <i>Streptococcus equinus</i> | strain: NBRC 12057     | ASM653894v1                             | GCF_006538945.1    | RefSeq | Contig          | 1926856 |
| <i>Streptococcus equinus</i> | strain: CNU 77-23      | ASM975807v1                             | GCF_009758075.1    | RefSeq | Complete Genome | 1911874 |
| <i>Streptococcus equinus</i> | strain: CNU G6         | ASM975809v1                             | GCF_009758095.1    | RefSeq | Complete Genome | 1997064 |
| <i>Streptococcus equinus</i> | strain: MDC1           | ASM1404187v1                            | GCF_014041875.1    | RefSeq | Complete Genome | 1936555 |
| <i>Streptococcus equinus</i> | strain: Colony399      | ASM1690612v1                            | GCF_016906125.1    | RefSeq | Chromosome      | 1904424 |
| <i>Streptococcus equinus</i> | strain: C277           | IMG-taxon 2623621021 annotated assembly | GCF_900099885.1    | RefSeq | Scaffold        | 1825979 |
| <i>Streptococcus equinus</i> | strain: GA-1           | IMG-taxon 2593339267 annotated assembly | GCF_900100035.1    | RefSeq | Contig          | 1799853 |
| <i>Streptococcus equinus</i> | strain: MPR2           | IMG-taxon 2651870307 annotated assembly | GCF_900100215.1    | RefSeq | Scaffold        | 1863305 |

|                                            |                                                  |                 |        |          |         |
|--------------------------------------------|--------------------------------------------------|-----------------|--------|----------|---------|
| <i>Streptococcus equinus</i> strain: Sb05  | IMG-taxon<br>2654588139<br>annotated<br>assembly | GCF_900101445.1 | RefSeq | Scaffold | 1962621 |
| <i>Streptococcus equinus</i> strain: Sb10  | IMG-taxon<br>2654588134<br>annotated<br>assembly | GCF_900101715.1 | RefSeq | Contig   | 1887161 |
| <i>Streptococcus equinus</i> strain: pGA-7 | IMG-taxon<br>2608642168<br>annotated<br>assembly | GCF_900102715.1 | RefSeq | Scaffold | 1797051 |
| <i>Streptococcus equinus</i> strain: Sb09  | IMG-taxon<br>2654588197<br>annotated<br>assembly | GCF_900103355.1 | RefSeq | Scaffold | 2042259 |
| <i>Streptococcus equinus</i> strain: Sb04  | IMG-taxon<br>2651870306<br>annotated<br>assembly | GCF_900104225.1 | RefSeq | Contig   | 1875611 |
| <i>Streptococcus equinus</i> strain: Sb17  | IMG-taxon<br>2654588136<br>annotated<br>assembly | GCF_900106895.1 | RefSeq | Contig   | 1909978 |
| <i>Streptococcus equinus</i> strain: Ye01  | IMG-taxon<br>2654588209<br>annotated<br>assembly | GCF_900109105.1 | RefSeq | Contig   | 1931095 |
| <i>Streptococcus equinus</i> strain: pR-5  | IMG-taxon<br>2608642181<br>annotated<br>assembly | GCF_900109395.1 | RefSeq | Scaffold | 1820620 |
| <i>Streptococcus equinus</i> strain: H24   | IMG-taxon<br>2654588151<br>annotated<br>assembly | GCF_900109415.1 | RefSeq | Scaffold | 1875780 |
| <i>Streptococcus equinus</i> strain: ES1   | IMG-taxon<br>2623620585<br>annotated<br>assembly | GCF_900110365.1 | RefSeq | Scaffold | 1827295 |
| <i>Streptococcus equinus</i> strain: Sb18  | IMG-taxon<br>2654588130<br>annotated<br>assembly | GCF_900110845.1 | RefSeq | Contig   | 1991056 |
| <i>Streptococcus equinus</i> strain: MPR1  | IMG-taxon<br>2651870309<br>annotated<br>assembly | GCF_900110935.1 | RefSeq | Scaffold | 1864122 |
| <i>Streptococcus equinus</i> strain: Sb13  | IMG-taxon<br>2654588137<br>annotated<br>assembly | GCF_900112385.1 | RefSeq | Scaffold | 1878198 |

|                                                          |                                                  |                 |        |                    |         |
|----------------------------------------------------------|--------------------------------------------------|-----------------|--------|--------------------|---------|
| <i>Streptococcus equinus</i> strain: MPR4                | IMG-taxon<br>2654588204<br>annotated<br>assembly | GCF_900113235.1 | RefSeq | Scaffold           | 1912748 |
| <i>Streptococcus equinus</i> strain: JB1                 | IMG-taxon<br>2593339156<br>annotated<br>assembly | GCF_900114525.1 | RefSeq | Scaffold           | 1967362 |
| <i>Streptococcus equinus</i> strain: SI                  | IMG-taxon<br>2654588207<br>annotated<br>assembly | GCF_900115895.1 | RefSeq | Scaffold           | 1912510 |
| <i>Streptococcus equinus</i> strain: Sb20                | IMG-taxon<br>2654588135<br>annotated<br>assembly | GCF_900115995.1 | RefSeq | Scaffold           | 1894454 |
| <i>Streptococcus equinus</i> strain: AR3                 | IMG-taxon<br>2654588192<br>annotated<br>assembly | GCF_900199575.1 | RefSeq | Contig             | 2021307 |
| <i>Streptococcus equinus</i> strain: NCTC12969 42197_F02 |                                                  | GCF_900459295.1 | RefSeq | Contig             | 1806069 |
| <i>Streptococcus equinus</i> strain: NCTC10386 42912_H01 |                                                  | GCF_900459945.1 | RefSeq | Contig             | 1759508 |
| <i>Streptococcus equinus</i> strain: NCTC8140 42290_E02  |                                                  | GCF_900636465.1 | RefSeq | Complete<br>Genome | 1873522 |
| <i>Streptococcus equinus</i> strain: NCTC10389 42880_B01 |                                                  | GCF_900636565.1 | RefSeq | Complete<br>Genome | 1781995 |
| <i>Streptococcus equinus</i> strain: NCTC8133 42290_D02  |                                                  | GCF_901543475.1 | RefSeq | Complete<br>Genome | 1867673 |
| <i>Streptococcus equinus</i> isolate: MGYG-HGUT-01308    | MGYG-HGUT-01308                                  | GCF_902373735.1 | RefSeq | Scaffold           | 1925187 |
| <i>Streptococcus equinus</i> isolate: MGYG-HGUT-01363    | MGYG-HGUT-01363                                  | GCF_902374225.1 | RefSeq | Scaffold           | 1741734 |

**Supplementary Table S3.** Nisin resistance protein sequences used in pan genome screen.

| UniProt Entry | Entry Name       | Protein names                                      | Gene Names                                      | Organism                                                                                  | Length |
|---------------|------------------|----------------------------------------------------|-------------------------------------------------|-------------------------------------------------------------------------------------------|--------|
| A0A0A0DLE3    | A0A0A0DLE3_9STRE | Nisin-resistance protein                           | SSIN_0444                                       | <i>Streptococcus sinensis</i>                                                             | 314    |
| A0A0G2Z1C9    | A0A0G2Z1C9_STRAG | Nisin-resistance protein, putative                 | RDF_0967                                        | <i>Streptococcus agalactiae</i>                                                           | 117    |
| A0A0G2Z5M0    | A0A0G2Z5M0_STRAG | Nisin-resistance protein, putative                 | RDF_0966                                        | <i>Streptococcus agalactiae</i>                                                           | 179    |
| A0A139P896    | A0A139P896_9STRE | Nisin-resistance protein                           | STRDD11_00955                                   | <i>Streptococcus sp. DD11</i>                                                             | 315    |
| A0A140UHB6    | A0A140UHB6_STRAG | Putative nisin-resistance protein                  | SAL_1042                                        | <i>Streptococcus agalactiae</i> 515                                                       | 167    |
| A0A1A9E115    | A0A1A9E115_STRAG | Nisin-resistance protein, putative (Peptidase S41) | DK41_05165<br>NCTC8183_01371                    | <i>Streptococcus agalactiae</i>                                                           | 320    |
| A0A2X2M2N2    | A0A2X2M2N2_STRAG | Nisin-resistance protein, putative (Peptidase S41) | D5F95_09920<br>NCTC8181_02301<br>NCTC8185_02307 | <i>Streptococcus agalactiae</i>                                                           | 320    |
| A0A2X3VPC5    | A0A2X3VPC5_STRSA | Nisin resistance protein                           | NCTC11085_01675                                 | <i>Streptococcus sanguinis</i>                                                            | 336    |
| A0A2X3YJM2    | A0A2X3YJM2_STRSA | Nisin resistance protein                           | NCTC11086_00744                                 | <i>Streptococcus sanguinis</i>                                                            | 336    |
| A0A380IMG6    | A0A380IMG6_STRAG | Nisin-resistance protein, putative                 | NCTC6175_01352                                  | <i>Streptococcus agalactiae</i>                                                           | 320    |
| A0A380JWG9    | A0A380JWG9_STRDY | Nisin-resistance protein                           | nsr<br>NCTC4670_00790                           | <i>Streptococcus dysgalactiae subsp. dysgalactiae</i>                                     | 321    |
| A0A380KH18    | A0A380KH18_STREQ | Nisin-resistance protein                           | nsr<br>NCTC11564_00976                          | <i>Streptococcus dysgalactiae subsp. equisimilis</i> ( <i>Streptococcus equisimilis</i> ) | 321    |
| A0A380L0L5    | A0A380L0L5_9STRE | Nisin resistance protein                           | NCTC13765_01951                                 | <i>Streptococcus massiliensis</i>                                                         | 159    |
| A0A380M477    | A0A380M477_9STRE | Putative nisin-resistance protein                  | NCTC1080_00568                                  | <i>Streptococcus viridans</i>                                                             | 313    |
| A0A448DKR6    | A0A448DKR6_STREQ | Nisin-resistance protein                           | nsr<br>NCTC6181_01847                           | <i>Streptococcus dysgalactiae subsp. equisimilis</i> ( <i>Streptococcus equisimilis</i> ) | 321    |
| A0A4U9YX70    | A0A4U9YX70_STREQ | Nisin-resistance protein                           | nsr<br>NCTC6407_00995                           | <i>Streptococcus dysgalactiae subsp. equisimilis</i> ( <i>Streptococcus equisimilis</i> ) | 321    |
| A0A4V0C1Q5    | A0A4V0C1Q5_STRCB | Nisin-resistance protein                           | nsr<br>NCTC6198_01136<br>TANIYAMA4_0743         | <i>Streptococcus canis</i>                                                                | 320    |

| UniProt Entry | Entry Name       | Protein names                            | Gene Names                         | Organism                                                                                         | Length |
|---------------|------------------|------------------------------------------|------------------------------------|--------------------------------------------------------------------------------------------------|--------|
| A0A4V0CQZ6    | A0A4V0CQZ6_STRDY | Nisin-resistance protein                 | nsr<br>NCTC7982_01632              | <i>Streptococcus dysgalactiae</i>                                                                | 321    |
| A0A509DCT4    | A0A509DCT4_9STRE | Nisin-resistance protein                 | nsr<br>NCTC11567_01111             | <i>Streptococcus sp.</i><br>NCTC 11567                                                           | 321    |
| A0A8B4IQF1    | A0A8B4IQF1_STRUB | Nisin-resistance protein                 | nsr<br>NCTC3858_01034              | <i>Streptococcus uberis</i>                                                                      | 320    |
| A0A8B6LB27    | A0A8B6LB27_STREQ | Nisin-resistance protein (Peptidase S41) | nsr BBG08_07485<br>NCTC11557_01376 | <i>Streptococcus dysgalactiae</i> subsp. <i>equisimilis</i> ( <i>Streptococcus equisimilis</i> ) | 321    |
| A3CPD7        | A3CPD7_STRSV     | Nisin resistance protein, putative       | SSA_1656                           | <i>Streptococcus sanguinis</i> (strain SK36)                                                     | 336    |
| E6J086        | E6J086_STRAP     | Nisin-resistance protein                 | nsr<br>HMPREF0813_00656            | <i>Streptococcus anginosus</i> F0211                                                             | 317    |
| F0FC69        | F0FC69_STRSA     | Nisin-resistance protein                 | nsr<br>HMPREF9388_0252             | <i>Streptococcus sanguinis</i> SK353                                                             | 336    |
| F0FT01        | F0FT01_STRSA     | Nisin-resistance protein                 | nsr<br>HMPREF9392_1733             | <i>Streptococcus sanguinis</i> SK678                                                             | 336    |
| F0I2W2        | F0I2W2_STRSA     | Nisin resistance protein                 | HMPREF9381_1502                    | <i>Streptococcus sanguinis</i> SK72                                                              | 336    |
| F0I5L0        | F0I5L0_STRSA     | Nisin resistance protein                 | HMPREF9382_0164                    | <i>Streptococcus sanguinis</i> SK115                                                             | 314    |
| F0IL53        | F0IL53_STRSA     | Nisin resistance protein                 | HMPREF9383_0855                    | <i>Streptococcus sanguinis</i> SK150                                                             | 336    |
| F0IWA8        | F0IWA8_STRSA     | Nisin resistance protein                 | HMPREF9384_2120                    | <i>Streptococcus sanguinis</i> SK160                                                             | 336    |
| F2BQW8        | F2BQW8_STRSA     | Nisin resistance protein                 | HMPREF9394_0793                    | <i>Streptococcus sanguinis</i> SK1057                                                            | 336    |
| F2C524        | F2C524_STRSA     | Nisin resistance protein                 | HMPREF9386_0177                    | <i>Streptococcus sanguinis</i> SK330                                                             | 336    |
| F2CCD0        | F2CCD0_STRSA     | Nisin resistance protein                 | HMPREF9391_0158                    | <i>Streptococcus sanguinis</i> SK408                                                             | 336    |
| F3SGA9        | F3SGA9_STRSA     | Nisin resistance protein                 | HMPREF9397_0181                    | <i>Streptococcus sanguinis</i> SK1087                                                            | 336    |
| F3U958        | F3U958_STRSA     | Nisin resistance protein                 | HMPREF9393_0161                    | <i>Streptococcus sanguinis</i> SK1056                                                            | 336    |
| F3UTK7        | F3UTK7_STRSA     | Nisin resistance protein                 | HMPREF9389_2165                    | <i>Streptococcus sanguinis</i> SK355                                                             | 336    |
| F3UW53        | F3UW53_STRSA     | Nisin resistance protein                 | HMPREF9380_0741                    | <i>Streptococcus sanguinis</i> SK49                                                              | 336    |
| M4YXC9        | M4YXC9_STREQ     | Putative nisin-resistance protein        | GGs_0959                           | <i>Streptococcus dysgalactiae</i> subsp. <i>equisimilis</i> RE378                                | 321    |
| Q8DZX2        | Q8DZX2_STRAS     | Nisin-resistance protein, putative       | SAG0973                            | <i>Streptococcus agalactiae</i> serotype V (strain ATCC BAA-611 / 2603 V/R)                      | 320    |

**Supplementary Data S4.** Nisin immunity protein sequences used in pan genome screen.

| UniProt Entry | Entry Name       | Protein Name           | Gene Name   | Organism                                                                       | Length |
|---------------|------------------|------------------------|-------------|--------------------------------------------------------------------------------|--------|
| P42708        | NISI_LACLL       | Nisin immunity protein | <i>nisI</i> | <i>Lactococcus lactis</i> subsp. <i>lactis</i> ( <i>Streptococcus lactis</i> ) | 245 AA |
| Q2QBS6        | Q2QBS6_STRUB     | NsuI                   | <i>nsuI</i> | <i>Streptococcus uberis</i>                                                    | 238 AA |
| A0A6C0GXF1    | A0A6C0GXF1_9STRE | Immunity protein NspI  | <i>nspI</i> | <i>Streptococcus gallolyticus</i>                                              | 238 AA |
| B5MEU0        | B5MEU0           | Immunity protein       | <i>niqI</i> | <i>Lactococcus lactis</i>                                                      | 238 AA |
| Q45403        | Q45403_BACIU     | SpaI                   | <i>spaI</i> | <i>Bacillus subtilis</i>                                                       | 165 AA |
| A0A286N5V2    | A0A286N5V2_9FIRM | NsoI                   | <i>nsol</i> | <i>Blautia obeum</i>                                                           | 278 AA |
| -             | -                | NseI                   | <i>nseI</i> | <i>Streptococcus equinus</i>                                                   | 245 AA |

**Supplementary Table S5.** Nucleotide accessions containing nisin operon sequences

| Species                                                                 | Strain    | Nisin Variant | NCBI Genome Accession | Assembly level  |
|-------------------------------------------------------------------------|-----------|---------------|-----------------------|-----------------|
| <i>Lactococcus lactis</i> subsp. <i>lactis</i>                          | ATCC11454 | A             | *                     | Contig          |
| <i>Lactococcus lactis</i> subsp. <i>lactis</i>                          | IO-1      | Z             | AP012281              | Complete genome |
| <i>Lactococcus lactis</i>                                               | 61-64     | Q             | AB362350              | Contig          |
| <i>Streptococcus hyointestinalis</i>                                    | DPC6484   | H             | KP793707              | Contig          |
| <i>Streptococcus agalactiae</i>                                         | DPC7040   | P             | WIDP01000009          | Contig          |
| <i>Streptococcus uberis</i>                                             | 42        | U             | DQ146939              | Contig          |
| <i>Staphylococcus capitis</i>                                           | APC2923   | J             | MN602039              | Contig          |
| <i>Blautia obeum</i>                                                    | A2-162    | O             | KY914474              | Contig          |
| <i>Streptococcus equinus</i>                                            | APC4007   | E             | JANHMF000000000       | Contig          |
| <i>Streptococcus equinus</i>                                            | APC4008   | E             | JANHME000000000       | Contig          |
| *Accessed from <a href="http://genomes.atcc.org/">genomes.atcc.org/</a> |           |               |                       |                 |

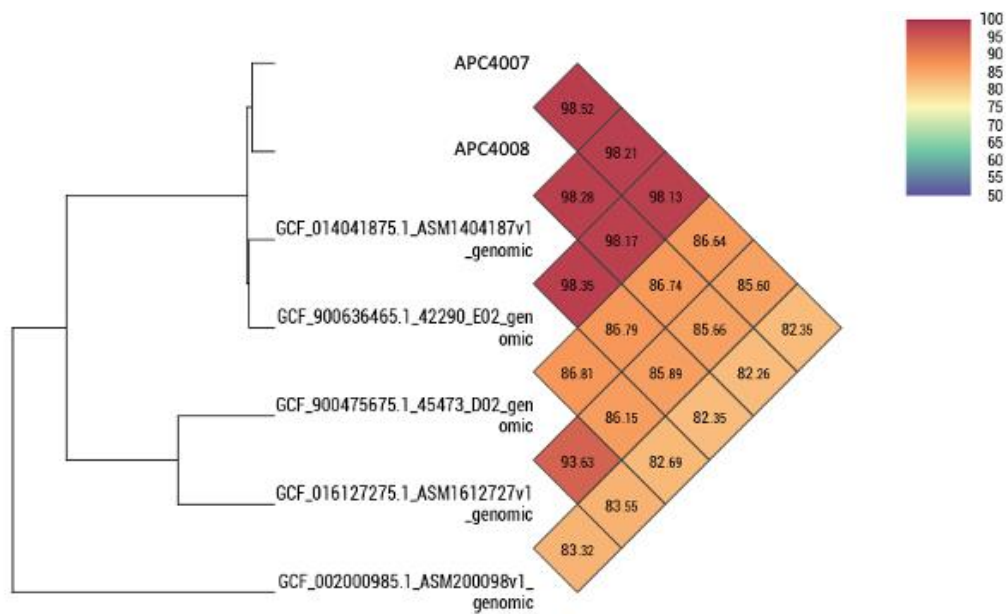

**Supplementary Figure S1.** Phylogram and genome average nucleotide identity (ANI) *S. equinus* APC4007 and *S. equinus* APC4008 compared with related *Streptococcus* spp. of the SBSEC. ANI values were calculated and visualised using OrthoANI<sup>1</sup>.





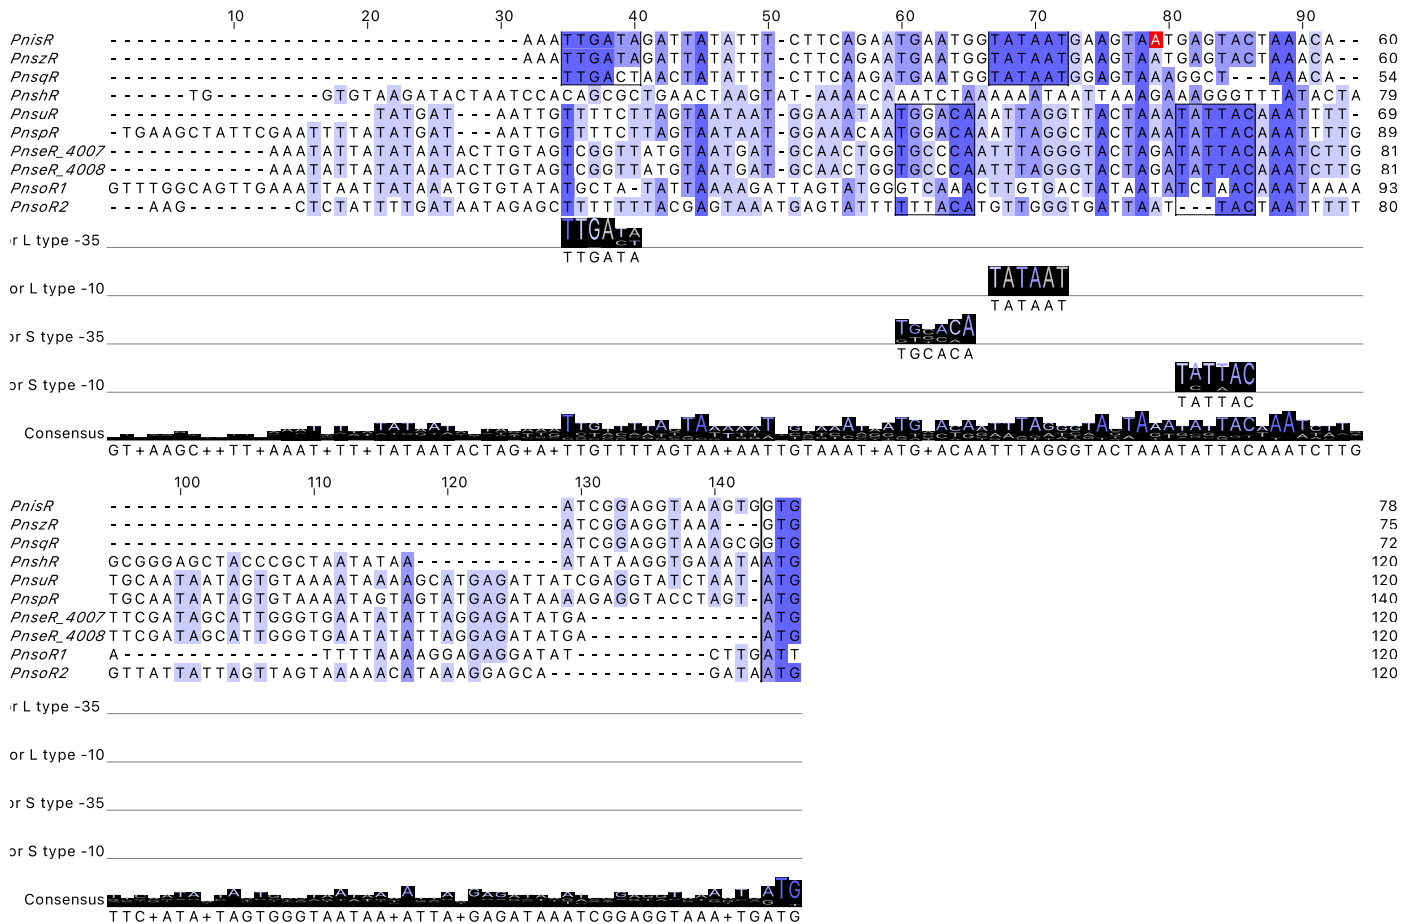

**Supplementary Figure S3.** Nucleotide sequence alignment of intergenic region upstream of *nisR* and homologous genes. Putative *Lactococcus* (L type) and *Streptococcus* (S type)-35 and -10 signals, ribosome binding sites and start codons are boxed with consensus sequences displayed below the alignment. Previously identified transcription start site (+1) highlighted in red. Nucleotides coloured by conservation.

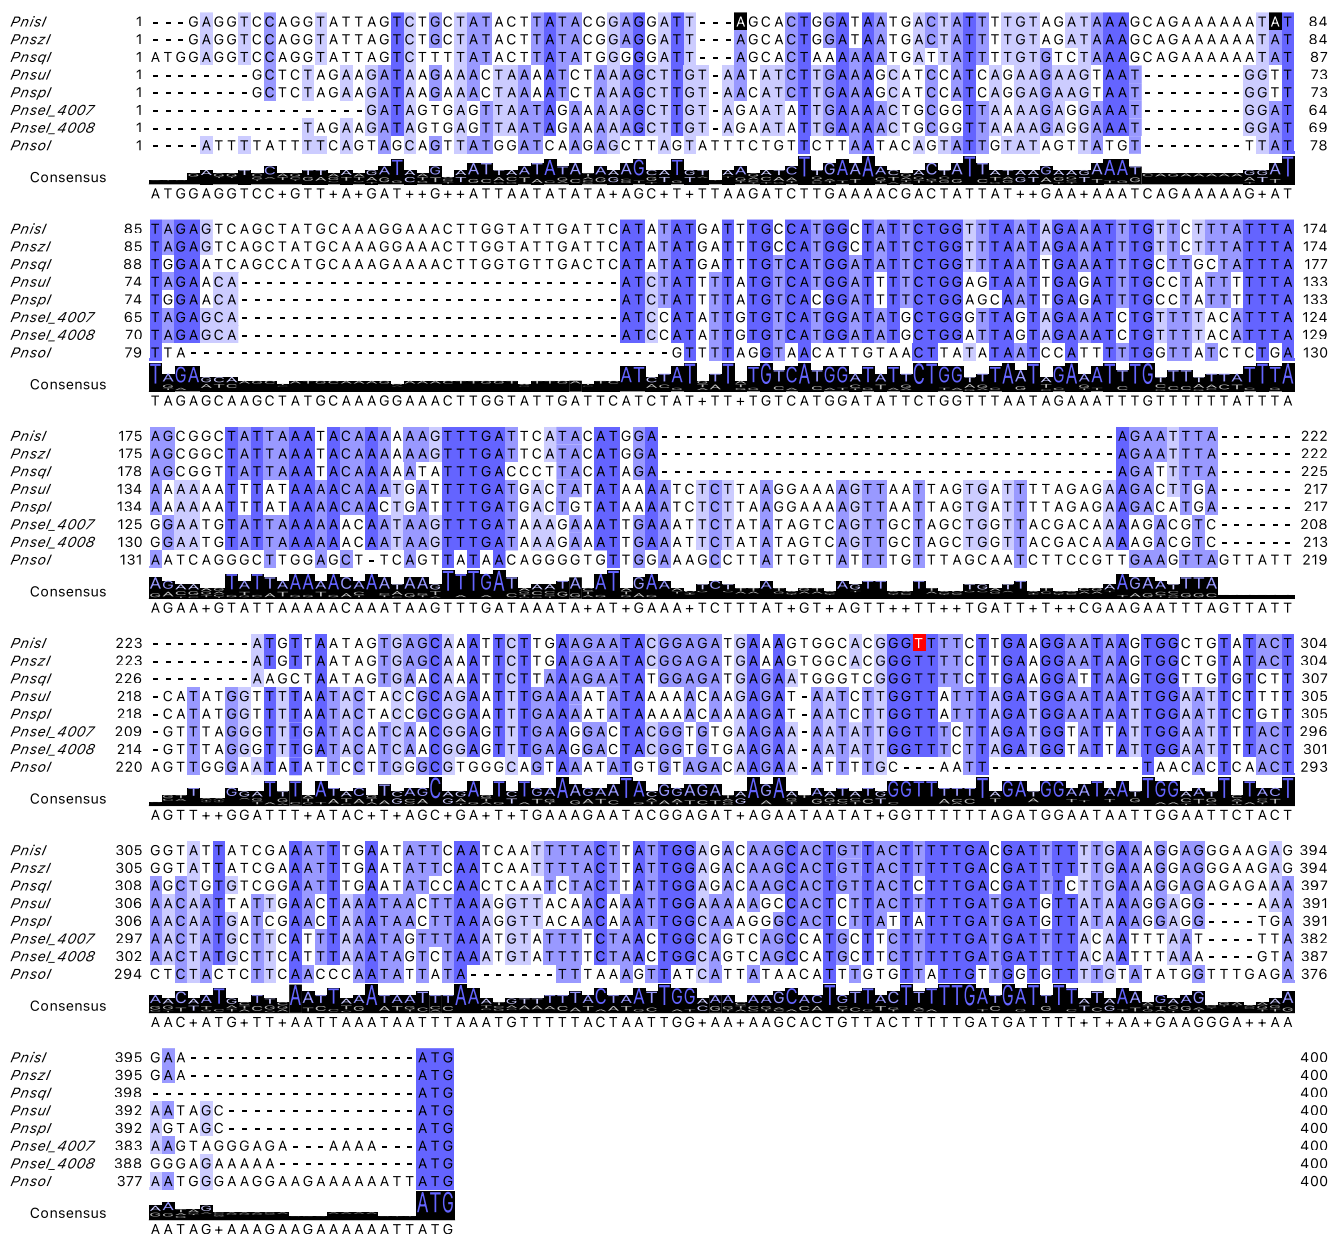

**Supplementary Figure S4.** Nucleotide sequence alignment of 400bp region upstream of *nisI* and homologous genes. Nucleotides coloured by conservation. Previously identified transcription start site (+1) highlighted in red. -234 and -194 nucleotides are highlighted in black.

**Supplementary Table S6.** ARNold predicted forward strand terminators from nisin variant operons.

#### Nisin A

Total number of predicted transcription terminators: 8

- 173 Both + AACCAAATCAAAGGATAGTATTTTGTAGTTCAGACATGGATACTATCCTaTTTTTATAAGTTA -7.90
- 3773 Rnamotif + CATGGAACATTGGGGTAGCAATTTTACTCCTTATTGTTCCAG -6.70
- 11173 Both + AAAAAATAAAAAAGTAATTTAGTAATCTCTAAGGATTACTTTTTTTGTTTCTG -3.40
- 13661 Erpin + ACAATGAAAAATCCAAGTATAAATACTTGGATTTTTCATTATTT -8.90

#### Nisin Z

Total number of predicted transcription terminators: 8

173 Both + AACCAAATCAAAGGATAGTATTTTGTAGTTCAGACATGGATACTATCCTaTTTTTATAAGTTA -7.90  
 3773 Rnamotif + CATGGAACATTGGGGTAGCAATTTTACTCCTTATTGTTCCAG -6.70  
 11173 Both + AAAAATAAAAAAGTAATTTAGTAATCTCTAAGGATTACTTTTTTTGTTTCTG -3.40  
 13661 Erpin + ACAATGAAAAATCCAAGTATAAATACTTGGATTTTTCATTATTT -8.90

#### Nisin Q

Total number of predicted transcription terminators: 2

344 Both + AACCAAATCAAAGGATAGTATTTTGTGACTTAGGTAAAGATACTATCCTaTTTTTATAAGTTA -7.90  
 3943 Rnamotif + CATGGAACATTGGAGTAGCATTTTTACTCCTTATTGTTCCAA -7.60

#### Nisin U

Total number of predicted transcription terminators: 7

1591 Rnamotif + TCCATTTCAACTCCTAAAGTCTCTGCAGCTTTGGGATTGATTATAGAA -7.70  
 3810 Erpin + AAAATTTTCAGAGGTAGCAACTAGAAAGTAATGCTACCTTTTTTCTGAACAA -10.30  
 6053 Both + ACAAGCAAAACACTTCTGTTGAAATCTAGTAAACTAGAAACAGGAGTaTTTTGTTATGGTC -6.80  
 7070 Rnamotif + GTTAAAATAAAGGTAGTGGATAGATAGCTTGCTACCTTTATTTTTATA -6.70  
 13995 Both + AATTTAGAACAGCAAGTTCAGGAGAGTTTGCTATTTTTTTGTCA -5.60  
 14922 Erpin + TTCATACAAACTGCCCTCCTATTATTAGATTTTATGTCTAACAATAGGAGGGCagTTCAAAGTGAATT -13.90

#### Nisin P

Total number of predicted transcription terminators: 5

1263 Both + CAATTTGACTCCTAAAGTCTCTGCAGCTTTAGGaTTGATTATAGAA -8.80  
 3514 Erpin + ATAAACAAAACCGCATGAAATCTTTCATTAAAAACGTTGATTTTATGCGaTTTTTTATTTCTGA -6.80  
 6429 Both + GCTAAAATAAAGGTAGTGGATAGTAGTCTACTACCTTTATTTTTATA -11.20  
 7044 Rnamotif + AGTTCATAAAGTTTATCAACTTATTGATGAGCTTTGTTGTGATA -7.10  
 13361 Both + AAAATATAGATCAGCAAGTTCAGAAGAGCTTGCTGTTTTTTGGTACA -10.60

#### Nisin E

Total number of predicted transcription terminators: 11

2184 Both + TATTCGGTTAACCAGCAGAGAATATGATTTGCTGGaTTTGCTATCAGC -11.70  
 3821 Both + AATTATATGAAGAGGTTGAGTTTAAAAGTGTTCAACCTCtTTGTTTATTTTGC -10.20  
 3963 Both + TGCCAAAAAGATGGCTTTAAATAGGCCATTTTAGGTCAGT -6.80  
 4338 Both + ATTAGGTGAAATAGCATCTTTTTAGATGCTATTTTCTTTTTTTC -9.90  
 4589 Rnamotif + TTAGAAGAAGCTGACAGTGGTGCTGTTGTTTTTAATGGTG -4.30  
 5020 Rnamotif + TGCTGACCACATTGTCATTTTACATGATGGCGAaaTTTTTTATGATG -7.00  
 5264 Rnamotif + TTCGTTTATTGGTGGGAAGCTATCTTTTTGTACACT -3.80  
 6618 Rnamotif + AAGTTGGAAGGTAGTATATAAAATAGCTACCTTTATTTTTATA -6.40  
 13497 Both + AATTAAATCAACCAGACAATCTATTTTTGTCTGGgTTTTATTTGTCA -11.90

#### Nisin O

Total number of predicted transcription terminators: 6

635 Rnamotif + ATGTGGAGAAGGATAGGACCTTACAAGTTCTATCTTTTTTGTATG -7.90  
 5587 Rnamotif + CCGTAGATCATTCTCCTACACATGGGGAGATTATTTTAAACG -7.20

5871 Rnamotif + GTTCAGGTTAGCTCTGGTGAATACACCAGAGTTTTTTTACTTT -14.20  
5913 Both + TTATAGGATTAGGGTGTCAAAAGCCCaTTTTAATATTTG -5.50  
7132 Erpin + ATACATAAAAAAGCTCTATTTTGATAATAGAGCTTTTTTTACGAGTA -8.90

Nisin J

Total number of predicted transcription terminators: 2

2136 Rnamotif + TTATTGTAAATTTTATTGTTGATAGCAGTAGATATTATTTAAT -4.60  
6650 Rnamotif + TACTTTTAGACGAGCCTAGTTCGGCTCTTGATTAGAAT -8.60

**Supplementary Table S7.** *Streptococcus equinus* genomes encoding *nse* genes.

| Strain     | Recorded Source                        | Genome Assembly Accession | Encodes               |
|------------|----------------------------------------|---------------------------|-----------------------|
| APC4007    | Sheep milk                             |                           | <i>nsePRKAFEGBTCI</i> |
| APC4008    | Sheep milk                             |                           | <i>nsePRKAFEGBTCI</i> |
| SI         | -                                      | GCA_900115895.1           | <i>nsePRKAFEGBTCI</i> |
| MDC1       | Canine oral cavity                     | GCA_014041875.1           | <i>nsePRKAFEGBTCI</i> |
| GA-1       | -                                      | GCA_900100035.1           | <i>nsePRKAFEGBTCI</i> |
| SN033 G637 | -                                      | GCA_000421425.1           | <i>nsePRKAFEGBTCI</i> |
| B315 G597  | -                                      | GCA_000424045.1           | <i>nsePRKAFEGBTCI</i> |
| pR-5       | -                                      | GCA_900109395.1           | <i>nsePRKAFEGBTCI</i> |
| AG46       | Sheep rumen                            | GCA_000964315.1           | <i>nseRKFEG</i>       |
| AR3        | -                                      | GCA_900199575.1           | <i>nseRKFEG</i>       |
| ATCC33317  | Cow dung                               | GCA_000747195.1           | <i>nseRKFEG</i>       |
| C277       | -                                      | GCA_900099885.1           | <i>nseRKFEG</i>       |
| CNU 77-23  | <i>Bos taurus</i> rumen fluid          | GCA_009758075.1           | <i>nseRKFEG</i>       |
| CNU G6     | <i>Bos taurus coreanae</i> rumen fluid | GCA_009758095.1           | <i>nseRKFEG</i>       |
| ES1        | -                                      | GCA_900110365.1           | <i>nseRKFEG</i>       |
| FMD1       | Forest musk deer                       | GCA_004525775.1           | <i>nseRKFEG</i>       |
| H24        | -                                      | GCA_900109415.1           | <i>nseRKFEG</i>       |
| HC5        | Cow rumen                              | GCA_000731085.1           | <i>nseRKFEG</i>       |
| MPR1       | -                                      | GCA_900110935.1           | <i>nseRKFEG</i>       |
| MPR2       | -                                      | GCA_900100215.1           | <i>nseRKFEG</i>       |
| MPR4       | -                                      | GCA_900113235.1           | <i>nseRKFEG</i>       |
| NBRC12057  | Bovine rumen contents                  | GCA_006538945.1           | <i>nseRKFEG</i>       |
| NCTC8133   | Infant faeces                          | GCA_901543475.1           | <i>nseRKFEG</i>       |
| NCTC8140   | -                                      | GCA_900636465.1           | <i>nseRKFEG</i>       |
| pGA-7      | -                                      | GCA_900102715.1           | <i>nseRKFEG</i>       |
| Sb04       | -                                      | GCA_900104225.1           | <i>nseRKFEG</i>       |
| Sb09       | -                                      | GCA_900103355.1           | <i>nseRKFEG</i>       |
| Ye01       | -                                      | GCA_900109105.1           | <i>nseRKFEG</i>       |

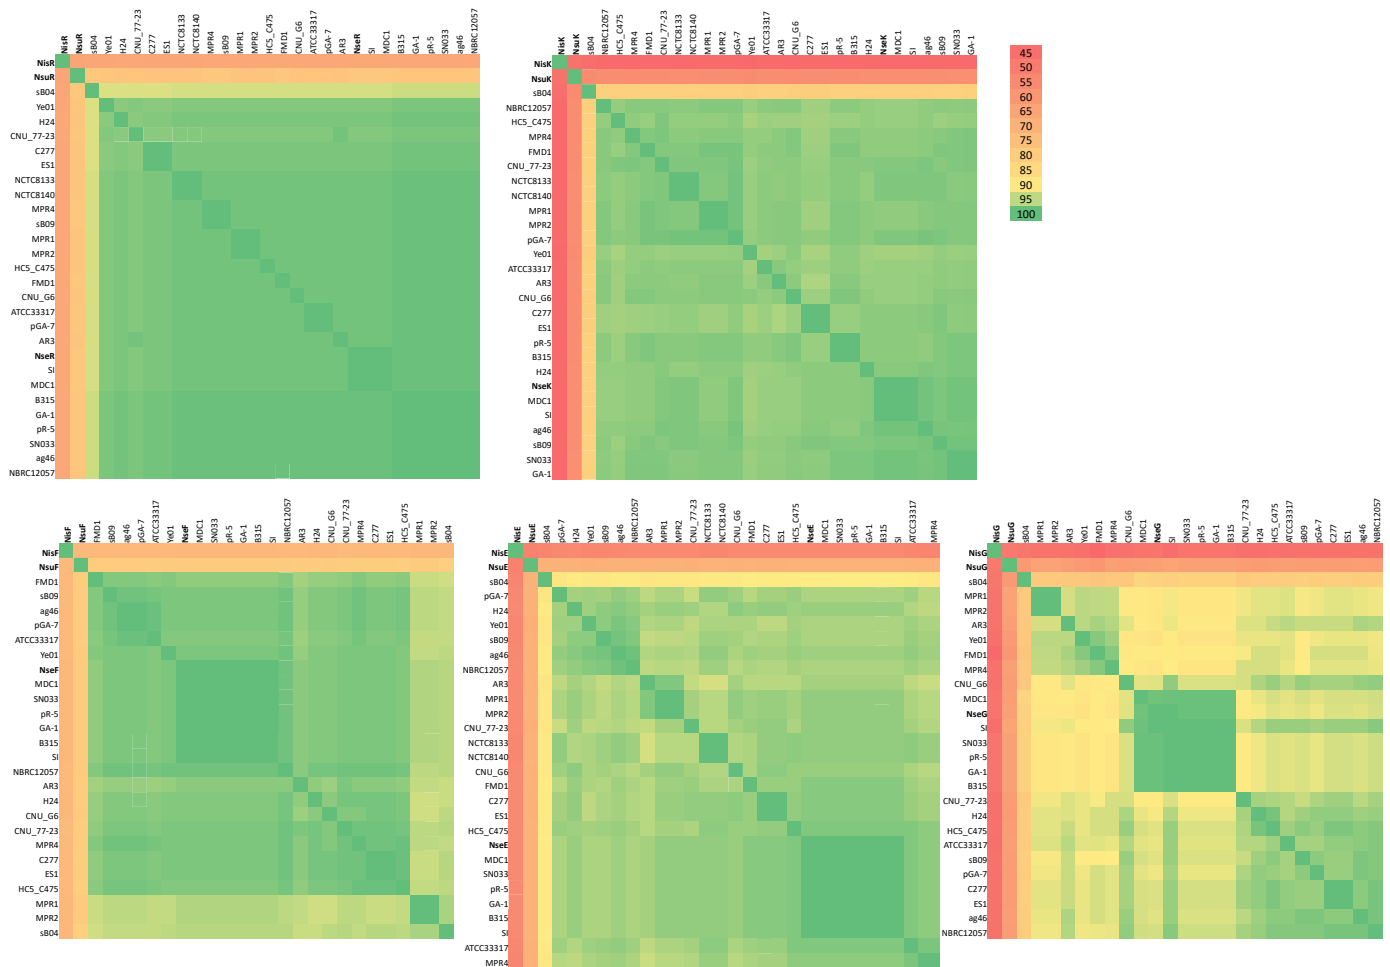

**Supplementary Figure S5.** Amino acid percent identity heatmaps of NseRKFEF proteins encoded in *S. equinus* genomes compared with *S. uberis* 42 nisin U (NsuRKFEF), and *Lactococcus lactis* ssp. *lactis* ATCC11454 nisin A (NisRKFEF) sequences.
